# Supplementary material for: Quantitative Recovery of Viable Lactobacillus paracasei CNCM I-1572 (L. casei DG®) After Gastrointestinal Passage in Healthy Adults
Source: Front Microbiol. 2018 Aug 2;9:1720. doi: 10.3389/fmicb.2018.01720 (PMC6083036; doi:10.3389/fmicb.2018.01720)

**Quantitative recovery of viable *Lactobacillus paracasei* CNCM I-1572 (*L. casei* DG<sup>®</sup>) after gastrointestinal passage in healthy adults**

Stefania Arioli, Ranjan Koirala, Valentina Taverniti, Walter Fiore, Simone Guglielmetti

**Supplementary Figure 1.** Confirmation of the identity of colonies by colony PCR with DG-specific primers.

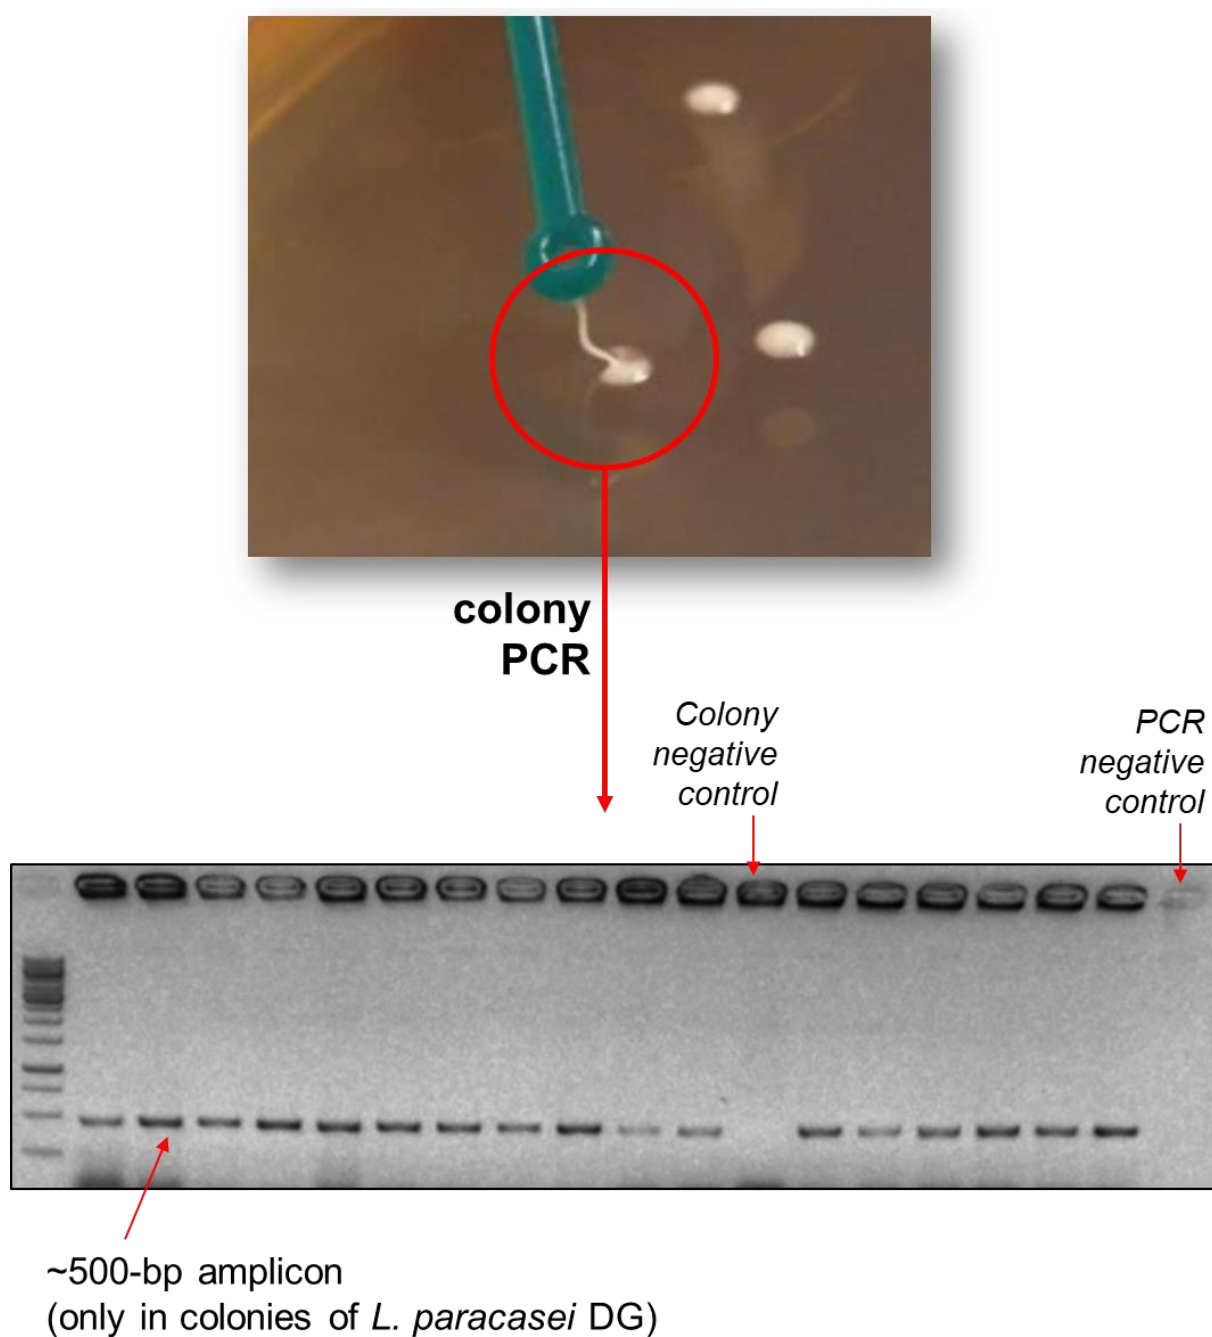

**Supplementary Figure 2.** Viable counts (black lines and circles) of *Lactobacillus paracasei* DG in the fecal samples, fecal type (blue columns) and evacuation per day (red squares and line) of healthy adult volunteers who ingested Enterolactis in drinkable vials (n=20). White circles refer to the viable counts of the DG strain in fecal samples collected during the week of probiotic intervention.

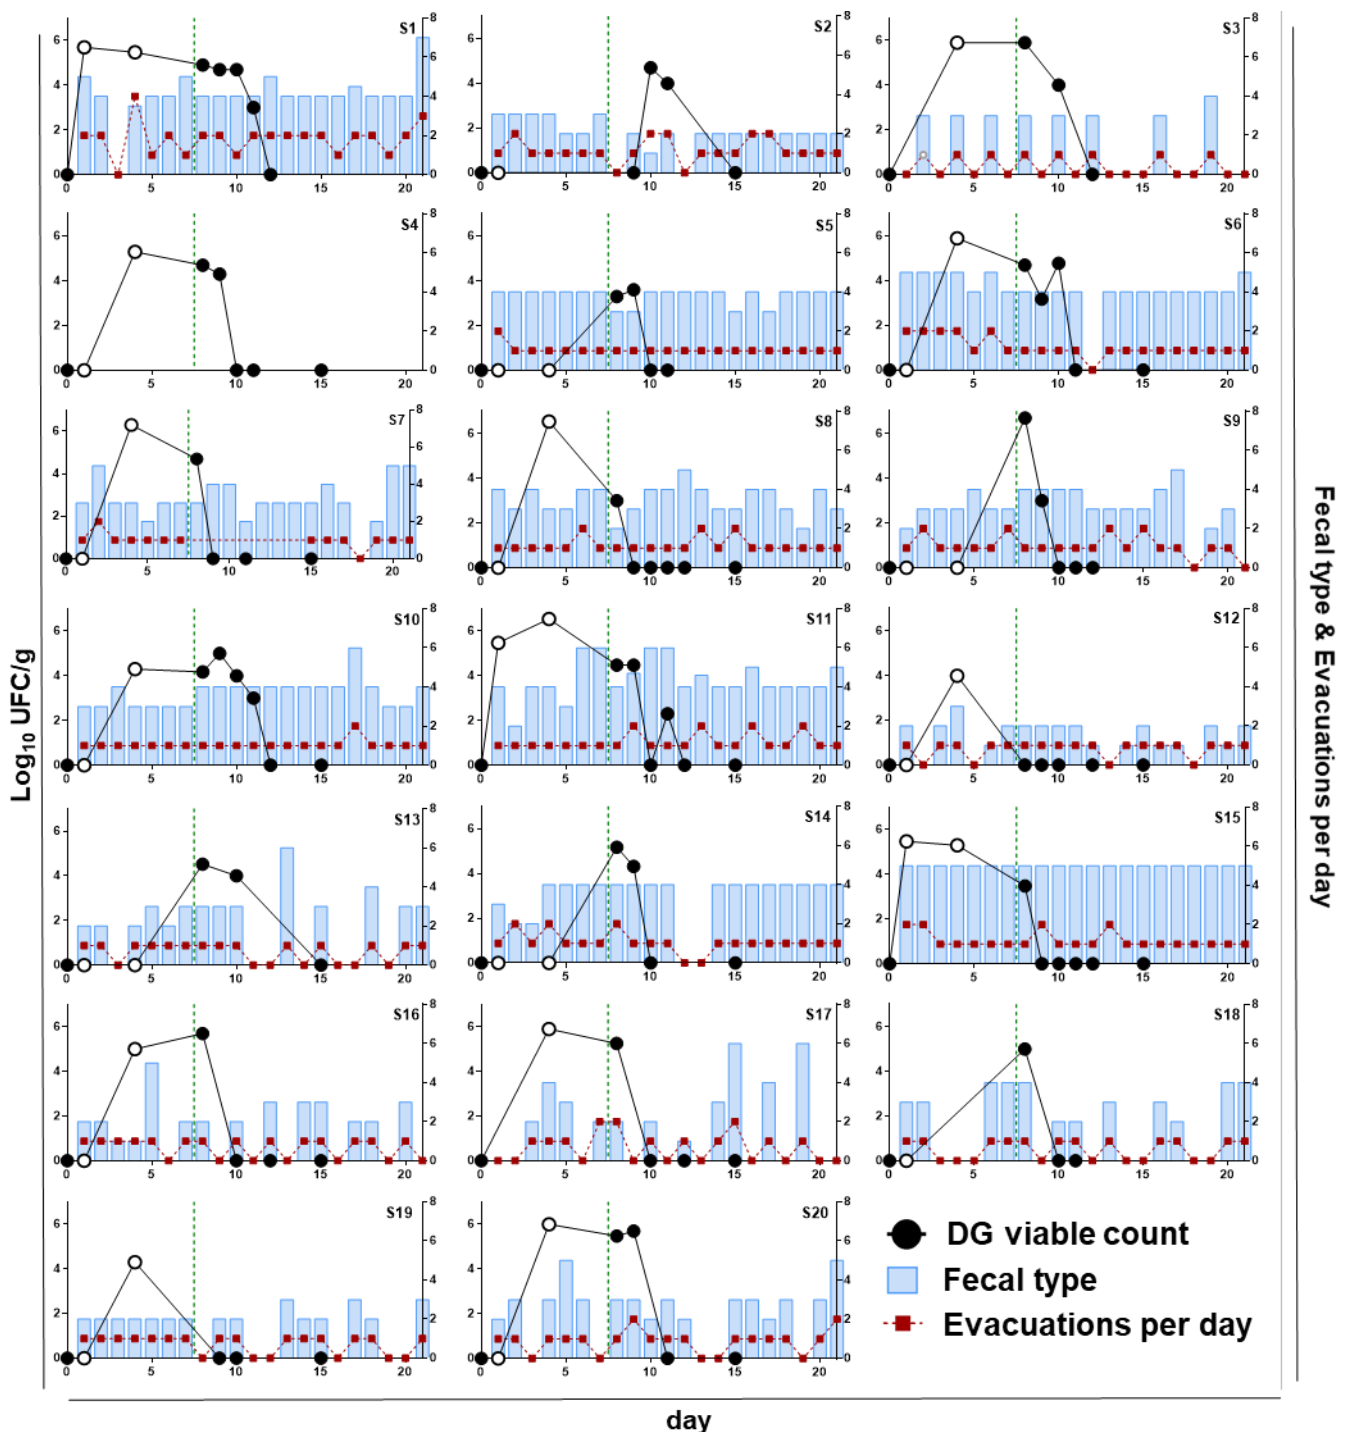

Supplement: Supplementary file 1 [file Data_Sheet_1.PDF]
